# Supplementary material for: Association of retinal venular tortuosity with impaired renal function in the Northern Ireland Cohort for the Longitudinal Study of Ageing
Source: PubMed Central journal article supplement (PMC7469276; doi:10.1186/s12882-020-02031-0), 2020-09-03
Supplement: 12882_2020_2031_MOESM2_ESM.pdf [file 12882_2020_2031_MOESM2_ESM.pdf]

NICOLA ID:

|  |  |  |  |  |  |
|--|--|--|--|--|--|
|  |  |  |  |  |  |
|--|--|--|--|--|--|

**Exclusion Criteria**

Has the participant:

| Question                                                        |          | If Yes Answered Exclude from :                                |
|-----------------------------------------------------------------|----------|---------------------------------------------------------------|
| Had recent eye surgery or detached retina in the past 4 weeks?  | Yes / No | Spirometry/ IOP/ Pupil dilation, AF images Optos & Spectralis |
| Had retinal/ subconjunctival haemorrhage in past 3 months       | Yes / No | Spirometry                                                    |
| Photo-sensitive epilepsy?                                       | Yes / No | Pupil dilation/ Canon/ Optus/Spectralis                       |
| Ever had a reaction to Tropicamide eye drops?                   | Yes / No | Tropicamide eye drops, AF images Optos & Spectralis           |
| Had hand/wrist surgery in past 6 months?                        | Yes / No | Grip strength                                                 |
| Hand/wrist: swelling, inflammation, severe pain, recent injury? | Yes / No | Grip strength                                                 |
| A pace-maker or electrical implantable device?                  | Yes / No | Bodystat                                                      |
| Possibility of Pregnancy?                                       | Yes / No | Bodystat                                                      |
| Currently on medication for TB?                                 | Yes / No | Spirometry                                                    |
| Had a chest infection/severe cold in the past 4 weeks?          | Yes / No | Spirometry                                                    |
| Had a heart attack in the past 3 months?                        | Yes / No | Spirometry                                                    |
| History of cerebral, abdominal or aortic aneurysm?              | Yes / No | Spirometry                                                    |
| Had a pneumothorax in the past 1 year?                          | Yes / No | Spirometry                                                    |
| Had a pulmonary embolism in past 3 months                       | Yes / No | Spirometry                                                    |
| Had any abdominal or chest surgery in last 3 months             | Yes / No | Spirometry                                                    |

| Pre Health Assessment check list       |                   |                           |
|----------------------------------------|-------------------|---------------------------|
| Are you Diabetic                       | Yes / No          |                           |
| Any Allergies                          | Yes / No          | If Yes Record Here:       |
| Pre discharge check list               |                   |                           |
| Warwick Edinburgh Questionnaire        | Yes / No          |                           |
| Travel Expenses Form                   | Yes / No          |                           |
| Nutrition Self Completion Booklet      | Yes / No          |                           |
| Self Completion Questionnaire Returned | Yes / No          |                           |
| Copy Consent Form                      | Yes / No          |                           |
| <b>COMMENTS:</b>                       |                   |                           |
| <b>Recorded By:</b>                    | <b>Signature:</b> | <b>Date:</b> __ / __ / __ |

| COMMENTS |                   |   |                      |
|----------|-------------------|---|----------------------|
| 1        | Refused Test      | 4 | Test Incomplete      |
| 2        | Physically Unable | 5 | Test Abandoned       |
| 3        | Best Attempt      | 6 | Other (please State) |

NICOLA ID:

|  |  |  |  |  |  |
|--|--|--|--|--|--|
|  |  |  |  |  |  |
|--|--|--|--|--|--|

|                                                                                                                                                                                    |                              |             |           |                                   |
|------------------------------------------------------------------------------------------------------------------------------------------------------------------------------------|------------------------------|-------------|-----------|-----------------------------------|
| Age                                                                                                                                                                                | _ _ Years                    | Gender      | M/F       | Comments<br>(Insert Code)         |
| Start Time                                                                                                                                                                         | _ _ : _ _                    | Finish Time | _ _ : _ _ |                                   |
| <b>Hearing</b>                                                                                                                                                                     |                              |             |           | <b>Comments<br/>(Insert Code)</b> |
| Do you use any of the following aids or appliances to help with your hearing?                                                                                                      | Hearing aid all of the time  | Y/N         |           |                                   |
|                                                                                                                                                                                    | Hearing aid some of the time | Y/N         |           |                                   |
|                                                                                                                                                                                    | Amplifier                    | Y/N         |           |                                   |
|                                                                                                                                                                                    | None of above                | Y/N         |           |                                   |
|                                                                                                                                                                                    | Don't know                   | Y/N         |           |                                   |
|                                                                                                                                                                                    | Refused                      | Y/N         |           |                                   |
| Is your hearing (with or without a hearing aid)?                                                                                                                                   | Excellent                    | Y/N         |           |                                   |
|                                                                                                                                                                                    | Very good                    | Y/N         |           |                                   |
|                                                                                                                                                                                    | Good                         | Y/N         |           |                                   |
|                                                                                                                                                                                    | Fair                         | Y/N         |           |                                   |
|                                                                                                                                                                                    | Poor                         | Y/N         |           |                                   |
|                                                                                                                                                                                    | Refused                      | Y/N         |           |                                   |
| Can you follow a conversation with one person (with or without a hearing aid)? If participant asks, clarify that the environment to think of should be non-noisy, i.e. their home  | With no difficulty           | Y/N         |           |                                   |
|                                                                                                                                                                                    | With some difficulty         | Y/N         |           |                                   |
|                                                                                                                                                                                    | With much difficulty         | Y/N         |           |                                   |
|                                                                                                                                                                                    | No I cannot                  | Y/N         |           |                                   |
|                                                                                                                                                                                    | Don't know                   | Y/N         |           |                                   |
|                                                                                                                                                                                    | Refused                      | Y/N         |           |                                   |
| Can you follow a conversation with four people (with or without a hearing aid)? If participant asks, clarify that the environment to think of should be non-noisy, i.e. their home | With no difficulty           | Y/N         |           |                                   |
|                                                                                                                                                                                    | With some difficulty         | Y/N         |           |                                   |
|                                                                                                                                                                                    | With much difficulty         | Y/N         |           |                                   |
|                                                                                                                                                                                    | No I cannot                  | Y/N         |           |                                   |
|                                                                                                                                                                                    | Don't know                   | Y/N         |           |                                   |
|                                                                                                                                                                                    | Refused                      | Y/N         |           |                                   |
| Can you use a normal telephone? (A 'normal telephone' means a phone that has not been adapted for hearing impairment)                                                              | With no difficulty           | Y/N         |           |                                   |
|                                                                                                                                                                                    | With some difficulty         | Y/N         |           |                                   |
|                                                                                                                                                                                    | With much difficulty         | Y/N         |           |                                   |
|                                                                                                                                                                                    | No I cannot                  | Y/N         |           |                                   |
|                                                                                                                                                                                    | Don't know                   | Y/N         |           |                                   |
|                                                                                                                                                                                    | Refused                      | Y/N         |           |                                   |

| COMMENTS |                   |   |                      |
|----------|-------------------|---|----------------------|
| 1        | Refused Test      | 4 | Test Incomplete      |
| 2        | Physically Unable | 5 | Test Abandoned       |
| 3        | Best Attempt      | 6 | Other (please State) |

NICOLA ID:

|  |  |  |  |  |  |
|--|--|--|--|--|--|
|  |  |  |  |  |  |
|--|--|--|--|--|--|

|                                                                                                                                                                                                        |                                        |     |  |
|--------------------------------------------------------------------------------------------------------------------------------------------------------------------------------------------------------|----------------------------------------|-----|--|
| Do you get or have you had noises (such as ringing or buzzing) in your head or in one or both ears that lasts for more than five minutes at a time?                                                    | Yes, now a lot of the time             | Y/N |  |
|                                                                                                                                                                                                        | Yes, now most or all of the time       | Y/N |  |
|                                                                                                                                                                                                        | Yes, now some of the time              | Y/N |  |
|                                                                                                                                                                                                        | Yes, but not now, but have in the past | Y/N |  |
|                                                                                                                                                                                                        | No, never                              | Y/N |  |
|                                                                                                                                                                                                        | Don't know                             | Y/N |  |
|                                                                                                                                                                                                        | Refused                                | Y/N |  |
| How much do these noises worry, annoy or upset you when they are at their worst?                                                                                                                       | Severely                               | Y/N |  |
|                                                                                                                                                                                                        | Moderately                             | Y/N |  |
|                                                                                                                                                                                                        | Slightly                               | Y/N |  |
|                                                                                                                                                                                                        | Not at all                             | Y/N |  |
|                                                                                                                                                                                                        | Don't know                             | Y/N |  |
|                                                                                                                                                                                                        | Refused                                | Y/N |  |
| Have you ever worked in a noisy place where you had to shout to be heard                                                                                                                               | More than 5 years                      | Y/N |  |
|                                                                                                                                                                                                        | Less than 5 years                      | Y/N |  |
|                                                                                                                                                                                                        | Less than year                         | Y/N |  |
|                                                                                                                                                                                                        | Never                                  | Y/N |  |
|                                                                                                                                                                                                        | Don't know                             | Y/N |  |
|                                                                                                                                                                                                        | Refused                                | Y/N |  |
| Have you ever listened to music for more than 3 hours per week at a volume which you would need to shout to be heard or, if wearing headphones, someone else would need to shout for you to hear them? | More than 5 years                      | Y/N |  |
|                                                                                                                                                                                                        | Less than 5 years                      | Y/N |  |
|                                                                                                                                                                                                        | Less than year                         | Y/N |  |
|                                                                                                                                                                                                        | Never                                  | Y/N |  |
|                                                                                                                                                                                                        | Don't know                             | Y/N |  |
|                                                                                                                                                                                                        | Refused                                | Y/N |  |

|                     |                   |                       |
|---------------------|-------------------|-----------------------|
| <b>Recorded By:</b> | <b>Signature:</b> | <b>Date:</b> __/__/__ |
|---------------------|-------------------|-----------------------|

| COMMENTS            |                        |
|---------------------|------------------------|
| 1 Refused Test      | 4 Test Incomplete      |
| 2 Physically Unable | 5 Test Abandoned       |
| 3 Best Attempt      | 6 Other (please State) |

NICOLA ID:

|  |  |  |  |  |  |
|--|--|--|--|--|--|
|  |  |  |  |  |  |
|--|--|--|--|--|--|

| Vision                                                                                                                                                 |                             |     | Comments<br>(Insert Code) |
|--------------------------------------------------------------------------------------------------------------------------------------------------------|-----------------------------|-----|---------------------------|
| Do you usually wear glasses or contact lenses?<br>i.e. usually means most of time                                                                      |                             | Y/N |                           |
| Do you usually wear<br>(choose the item worn most often)                                                                                               | Ordinary glasses            | Y/N |                           |
|                                                                                                                                                        | Bifocals                    | Y/N |                           |
|                                                                                                                                                        | Contact lenses              | Y/N |                           |
|                                                                                                                                                        | Varifocals                  | Y/N |                           |
|                                                                                                                                                        | Don't know                  | Y/N |                           |
|                                                                                                                                                        | Refused                     | Y/N |                           |
| How long have you had bifocals                                                                                                                         | Less than 1 year            | Y/N |                           |
|                                                                                                                                                        | More than 1 year            | Y/N |                           |
|                                                                                                                                                        | N/A                         | Y/N |                           |
|                                                                                                                                                        | Don't know                  | Y/N |                           |
|                                                                                                                                                        | Refused                     | Y/N |                           |
| Is your eyesight (using glasses or contact lens if you use them)                                                                                       | Excellent                   | Y/N |                           |
|                                                                                                                                                        | Very good                   | Y/N |                           |
|                                                                                                                                                        | Good                        | Y/N |                           |
|                                                                                                                                                        | Fair                        | Y/N |                           |
|                                                                                                                                                        | Poor                        | Y/N |                           |
|                                                                                                                                                        | Registered or legally blind | Y/N |                           |
|                                                                                                                                                        | Don't know                  | Y/N |                           |
|                                                                                                                                                        | Refused                     | Y/N |                           |
| How good is your eyesight for seeing things at a distance, like recognising a friend across the street (using glasses or contact lens if you use them) | Excellent                   | Y/N |                           |
|                                                                                                                                                        | Very good                   | Y/N |                           |
|                                                                                                                                                        | Good                        | Y/N |                           |
|                                                                                                                                                        | Fair                        | Y/N |                           |
|                                                                                                                                                        | Poor                        | Y/N |                           |
|                                                                                                                                                        | Don't know                  | Y/N |                           |
|                                                                                                                                                        | Refused                     | Y/N |                           |

| COMMENTS |                   |   |                      |
|----------|-------------------|---|----------------------|
| 1        | Refused Test      | 4 | Test Incomplete      |
| 2        | Physically Unable | 5 | Test Abandoned       |
| 3        | Best Attempt      | 6 | Other (please State) |

NICOLA ID:

|  |  |  |  |  |  |
|--|--|--|--|--|--|
|  |  |  |  |  |  |
|--|--|--|--|--|--|

|                                                                                                                                                                                                  |                                  |     |                                  |
|--------------------------------------------------------------------------------------------------------------------------------------------------------------------------------------------------|----------------------------------|-----|----------------------------------|
| <b>How good is your eyesight for seeing things up close, like reading ordinary newspaper print (using glasses or contact lens if you use them)</b>                                               | Excellent                        | Y/N |                                  |
|                                                                                                                                                                                                  | Very good                        | Y/N |                                  |
|                                                                                                                                                                                                  | Good                             | Y/N |                                  |
|                                                                                                                                                                                                  | Fair                             | Y/N |                                  |
|                                                                                                                                                                                                  | Poor                             | Y/N |                                  |
|                                                                                                                                                                                                  | Don't know                       | Y/N |                                  |
|                                                                                                                                                                                                  | Refused                          | Y/N |                                  |
| <b>Has a doctor ever told you that you have any of the following eye diseases?</b>                                                                                                               | Cataracts                        | Y/N |                                  |
|                                                                                                                                                                                                  | Glaucoma                         | Y/N |                                  |
|                                                                                                                                                                                                  | Age Related Macular Degeneration | Y/N |                                  |
|                                                                                                                                                                                                  | Diabetic Retinopathy             | Y/N |                                  |
|                                                                                                                                                                                                  | Other: please state:             | Y/N |                                  |
| <b>Have you had cataract surgery</b>                                                                                                                                                             | Rt. eye                          | Y/N |                                  |
|                                                                                                                                                                                                  | Lt. eye                          | Y/N |                                  |
|                                                                                                                                                                                                  | Never                            | Y/N |                                  |
|                                                                                                                                                                                                  | Don't know                       | Y/N |                                  |
|                                                                                                                                                                                                  | Refused                          | Y/N |                                  |
| <b>In the last 12 months, how often did you visit your optician?</b>                                                                                                                             | __ days ago                      |     |                                  |
|                                                                                                                                                                                                  | __ weeks ago                     |     |                                  |
|                                                                                                                                                                                                  | __ months ago                    |     |                                  |
| <b>About how much did you pay out- of-pocket for visiting opticians, buying glasses or contact lenses in the last 12 months?(Amount of money on top of benefit which would cover some costs)</b> | £_ _ _ _ : _ _                   |     |                                  |
| <b>Recorded By:</b>                                                                                                                                                                              | <b>Signature:</b>                |     | <b>Date:</b> _ _ / _ _ / _ _ _ _ |

| COMMENTS |                   |   |                      |
|----------|-------------------|---|----------------------|
| 1        | Refused Test      | 4 | Test Incomplete      |
| 2        | Physically Unable | 5 | Test Abandoned       |
| 3        | Best Attempt      | 6 | Other (please State) |

NICOLA ID:

|  |  |  |  |  |  |
|--|--|--|--|--|--|
|  |  |  |  |  |  |
|--|--|--|--|--|--|

| Visual Acuity                  |           |          | Comments<br>(Insert Code) |
|--------------------------------|-----------|----------|---------------------------|
|                                | RIGHT EYE | LEFT EYE |                           |
| Distance glasses worn for test | Y/N       | Y/N      |                           |
| Corrective lens worn for test  | Y/N       | Y/N      |                           |

| IOP                                                                   |              |        |              |        | Comments<br>(Insert Code) |
|-----------------------------------------------------------------------|--------------|--------|--------------|--------|---------------------------|
|                                                                       |              |        |              |        |                           |
| <b>No IOP measurements to be taken if eye surgery in last 4 weeks</b> |              |        |              |        |                           |
| IOP                                                                   | Results      | Rt Eye | Results      | Lt Eye |                           |
|                                                                       | IOPg1        |        | IOPg1        |        |                           |
|                                                                       | IOPg2        |        | IOPg2        |        |                           |
|                                                                       | IOPg3        |        | IOPg3        |        |                           |
|                                                                       | IOPg Average |        | IOPg Average |        |                           |

| AutoRefractor |     | Comments<br>(Insert Code) |
|---------------|-----|---------------------------|
| Printout      | Y/N |                           |

| Eye Drops                                                                                    |           |     |          |     | Comments<br>(Insert Code) |
|----------------------------------------------------------------------------------------------|-----------|-----|----------|-----|---------------------------|
| <b>Do not Dilate or undertake Retinal Imaging if Participant has Photosensitive Epilepsy</b> |           |     |          |     |                           |
| Eye Drops                                                                                    | Right Eye | Y/N | Left Eye | Y/N | Comments<br>(Insert Code) |
| Time: __ : __                                                                                |           |     |          |     |                           |
| Administered By:                                                                             |           |     |          |     |                           |

|              |            |                    |
|--------------|------------|--------------------|
| Recorded By: | Signature: | Date: __ / __ / __ |
|--------------|------------|--------------------|

| COMMENTS            |                        |
|---------------------|------------------------|
| 1 Refused Test      | 4 Test Incomplete      |
| 2 Physically Unable | 5 Test Abandoned       |
| 3 Best Attempt      | 6 Other (please State) |

NICOLA ID:

|  |  |  |  |  |  |
|--|--|--|--|--|--|
|  |  |  |  |  |  |
|--|--|--|--|--|--|

| 1                                    |   |   |   |   |   |           | NF | P/H | NF | P/H                                  |     |   |   |   |   |   |
|--------------------------------------|---|---|---|---|---|-----------|----|-----|----|--------------------------------------|-----|---|---|---|---|---|
| M<br>E<br>T<br>R<br>E                | C | O | H | Z | V | 5         |    |     |    |                                      | 5   | Z | R | K | D | C |
|                                      | S | Z | N | D | C | 10        |    |     |    |                                      | 10  | D | N | C | H | V |
|                                      | V | K | C | N | R | 15        |    |     |    |                                      | 15  | C | D | H | N | R |
|                                      | K | C | R | H | N | 20        |    |     |    |                                      | 20  | R | V | Z | O | S |
|                                      | Z | K | D | V | C | 25        |    |     |    |                                      | 25  | O | S | D | V | Z |
|                                      | H | V | O | R | K | 30        |    |     |    |                                      | 30  | N | O | Z | C | D |
| 4<br>M<br>E<br>T<br>R<br>E           | C | O | H | Z | V | 35        |    |     |    |                                      | 35  | Z | R | K | D | C |
|                                      | S | Z | N | D | C | 40        |    |     |    |                                      | 40  | D | N | C | H | V |
|                                      | V | K | C | N | R | 45        |    |     |    |                                      | 45  | C | D | H | N | R |
|                                      | K | C | R | H | N | 50        |    |     |    |                                      | 50  | R | V | Z | O | S |
|                                      | Z | K | D | V | C | 55        |    |     |    |                                      | 55  | O | S | D | V | Z |
|                                      | H | V | O | R | K | 60        |    |     |    |                                      | 60  | N | O | Z | C | D |
|                                      | R | H | S | O | N | 65        |    |     |    |                                      | 65  | R | D | N | S | K |
|                                      | K | S | V | R | H | 70        |    |     |    |                                      | 70  | O | K | S | V | Z |
|                                      | H | N | K | C | D | 75        |    |     |    |                                      | 75  | K | S | N | H | O |
|                                      | N | D | V | K | O | 80        |    |     |    |                                      | 80  | H | O | V | S | N |
|                                      | D | H | O | S | Z | 85        |    |     |    |                                      | 85  | V | C | S | Z | H |
|                                      | V | R | N | D | O | 90        |    |     |    |                                      | 90  | C | Z | D | R | V |
|                                      | C | Z | H | K | S | 95        |    |     |    |                                      | 95  | S | H | R | Z | C |
|                                      | O | R | Z | S | K | 100       |    |     |    |                                      | 100 | D | N | O | K | R |
| Total :                              |   |   |   |   |   |           |    |     |    |                                      |     |   |   |   |   |   |
| RE (tick)<br>CF<br>HM<br>LP<br>NO LP |   |   |   |   |   | COMMENTS: |    |     |    | LE (tick)<br>CF<br>HM<br>LP<br>NO LP |     |   |   |   |   |   |

|                     |                   |                       |
|---------------------|-------------------|-----------------------|
| <b>Recorded By:</b> | <b>Signature:</b> | <b>Date:</b> __/__/__ |
|---------------------|-------------------|-----------------------|

| COMMENTS            |                        |
|---------------------|------------------------|
| 1 Refused Test      | 4 Test Incomplete      |
| 2 Physically Unable | 5 Test Abandoned       |
| 3 Best Attempt      | 6 Other (please State) |

NICOLA ID:

|  |  |  |  |  |  |
|--|--|--|--|--|--|
|  |  |  |  |  |  |
|--|--|--|--|--|--|

| Anthropometric                |         |                                       |                         | Comments<br>(Insert Code) |
|-------------------------------|---------|---------------------------------------|-------------------------|---------------------------|
|                               | 1st     | 2nd                                   | 3 <sup>rd</sup> if req. |                           |
| <b>Waist</b><br>(nearest mm)  | _____.  | _____.                                | _____.                  |                           |
| <b>Hip</b><br>(nearest mm)    | _____.  | _____.                                | _____.                  |                           |
| <b>Height</b><br>(nearest cm) | ____ cm | <b>Weight</b><br>(to 1 decimal place) | _____ kg                |                           |

| Cardiovascular                                      |              |                    |       |                         | Comments<br>(Insert Code) |
|-----------------------------------------------------|--------------|--------------------|-------|-------------------------|---------------------------|
| <b>Blood Pressure</b>                               | Systolic     | Diastolic          | Pulse | Room Temp ____: ____ °C |                           |
| <b>BP 1</b>                                         | _____        | _____              | _____ |                         |                           |
| <b>BP 2</b>                                         | _____        | _____              | _____ |                         |                           |
| <b>BP 3</b>                                         | _____        | _____              | _____ |                         |                           |
| <b>On Standing:<br/>Circle Response</b>             | Dizzy<br>Y/N | Lightheaded<br>Y/N |       | Unsteady<br>Y/N         |                           |
| <b>BP Interpretation:<br/>Circle Interpretation</b> | Low          | Normal             |       | Elevated                |                           |
| <b>Nurse Action/<br/>Comments</b>                   |              |                    |       |                         |                           |

| Gait & Balance                                |                               |             |                   |  |  |                       | Comments<br>(Insert Code) |
|-----------------------------------------------|-------------------------------|-------------|-------------------|--|--|-----------------------|---------------------------|
| <b>Step Test</b>                              | Dominant Side<br>Right / Left | NO of Steps |                   |  |  |                       |                           |
|                                               |                               | Right foot  | Left foot         |  |  |                       |                           |
|                                               |                               | __          | __                |  |  |                       |                           |
| <b>Time Up &amp; Go</b><br>( to 2 dec places) |                               |             | :                 |  |  |                       |                           |
| <b>Recorded By:</b>                           |                               |             | <b>Signature:</b> |  |  | <b>Date:</b> __/__/__ |                           |

| COMMENTS            |                        |
|---------------------|------------------------|
| 1 Refused Test      | 4 Test Incomplete      |
| 2 Physically Unable | 5 Test Abandoned       |
| 3 Best Attempt      | 6 Other (please State) |



NICOLA ID:

|  |  |  |  |  |  |
|--|--|--|--|--|--|
|  |  |  |  |  |  |
|--|--|--|--|--|--|

| Grip Strength          |               |            |          | Comments<br>(Insert Code) |
|------------------------|---------------|------------|----------|---------------------------|
| (nearest whole number) | Non-Dom. Hand | Right/Left | __ __ KG |                           |
|                        | Dominant Hand | Right/Left | __ __ KG |                           |
|                        | Non-Dom. Hand | Right/Left | __ __ KG |                           |
|                        | Dominant Hand | Right/Left | __ __ KG |                           |

| Bloods                                                        |         | Comments<br>(Insert Code) |
|---------------------------------------------------------------|---------|---------------------------|
| Both Arms Suitable for Venepuncture                           | Y/N     |                           |
| Have you been diagnosed with a clotting or bleeding disorder? | Y/N     |                           |
| Time of last meal                                             | __ : __ |                           |
| Venepuncture Time                                             | __ : __ |                           |
| Yellow Top 4                                                  | Y/N     |                           |
| PAXgene RNA 1                                                 | Y/N     |                           |
| Purple Top 4                                                  | Y/N     |                           |
| Grey Top 1                                                    | Y/N     |                           |

| Other Tests         |                   |                           | Comments<br>(Insert Code) |
|---------------------|-------------------|---------------------------|---------------------------|
| <b>Bodystat</b>     | <b>Printout</b>   | Y/N                       |                           |
| <b>Urine</b>        |                   | Y/N                       |                           |
| <b>Photograph</b>   |                   | Y/N                       |                           |
| <b>Spirometry</b>   |                   | Y/N                       |                           |
| <b>Recorded By:</b> | <b>Signature:</b> | <b>Date:</b> __ / __ / __ |                           |

| COMMENTS |                   |   |                      |
|----------|-------------------|---|----------------------|
| 1        | Refused Test      | 4 | Test Incomplete      |
| 2        | Physically Unable | 5 | Test Abandoned       |
| 3        | Best Attempt      | 6 | Other (please State) |

NICOLA ID:

|  |  |  |  |  |  |
|--|--|--|--|--|--|
|  |  |  |  |  |  |
|--|--|--|--|--|--|

| Vision                |                                      |     |                                      |     | Comments<br>(Insert Code) |
|-----------------------|--------------------------------------|-----|--------------------------------------|-----|---------------------------|
|                       | <b>Rt Eye</b>                        |     | <b>Lt Eye</b>                        |     |                           |
| <b>Canon<br/>CX-1</b> | Fundus Reflex                        | Y/N | Fundus Reflex                        | Y/N |                           |
|                       | Field 1M (Optic)                     | Y/N | Field 1M (Optic)                     | Y/N |                           |
|                       | Field 2M (Macula)                    | Y/N | Field 2M (Macula)                    | Y/N |                           |
|                       | Stereoscopic Optic Disc              | Y/N | Stereoscopic Optic Disc              | Y/N |                           |
|                       | Stereoscopic Macula                  | Y/N | Stereoscopic Macula                  | Y/N |                           |
| <b>OPTOS</b>          | Colour Optomap Plus Images 2 on Axes | Y/N | Colour Optomap Plus Images 2 on Axes | Y/N |                           |
|                       | AF Optomap Plus 1 on Axes            | Y/N | AF Optomap Plus 1 on Axes            | Y/N |                           |
| <b>Spectralis</b>     | P Pole                               | Y/N | P Pole                               | Y/N |                           |
|                       | RNFL                                 | Y/N | RNFL                                 | Y/N |                           |
|                       | Line EDI                             | Y/N | Line EDI                             | Y/N |                           |
|                       | Multi                                | Y/N | Multi                                | Y/N |                           |
|                       | qAF                                  | Y/N | qAF                                  | Y/N |                           |
|                       | Blue AF Movie                        | Y/N | Blue AF Movie                        | Y/N |                           |

|                     |                   |                         |
|---------------------|-------------------|-------------------------|
| <b>Recorded By:</b> | <b>Signature:</b> | <b>Date:</b> __/__/____ |
|---------------------|-------------------|-------------------------|

| COMMENTS            |                        |
|---------------------|------------------------|
| 1 Refused Test      | 4 Test Incomplete      |
| 2 Physically Unable | 5 Test Abandoned       |
| 3 Best Attempt      | 6 Other (please State) |

NICOLA ID:

|  |  |  |  |  |  |
|--|--|--|--|--|--|
|  |  |  |  |  |  |
|--|--|--|--|--|--|

**MINI MENTAL STATE EXAMINATION (MMSE)**

|                     |                   |                           |
|---------------------|-------------------|---------------------------|
| <b>COMMENTS:</b>    |                   |                           |
| <b>Recorded By:</b> | <b>Signature:</b> | <b>Date:</b> __ / __ / __ |

| COMMENTS            |                        |
|---------------------|------------------------|
| 1 Refused Test      | 4 Test Incomplete      |
| 2 Physically Unable | 5 Test Abandoned       |
| 3 Best Attempt      | 6 Other (please State) |

NICOLA ID:

|  |  |  |  |  |  |
|--|--|--|--|--|--|
|  |  |  |  |  |  |
|--|--|--|--|--|--|

**Colour Trails 2**

|                                  |                     |
|----------------------------------|---------------------|
| <b>Time :</b><br>_ _ : _ _ : _ _ | <b>Total Score:</b> |
| <b>Colour Errors :</b>           | _ _                 |
| <b>Number Errors :</b>           | _ _                 |
| <b>Prompts :</b>                 | _ _                 |
| <b>Near misses :</b>             | _ _                 |

|                     |                   |                                    |
|---------------------|-------------------|------------------------------------|
| <b>COMMENTS:</b>    |                   |                                    |
| <b>Recorded By:</b> | <b>Signature:</b> | <b>Date:</b> _ _ / _ _ _ / _ _ _ _ |

| COMMENTS            |                        |
|---------------------|------------------------|
| 1 Refused Test      | 4 Test Incomplete      |
| 2 Physically Unable | 5 Test Abandoned       |
| 3 Best Attempt      | 6 Other (please State) |

NICOLA ID:

|  |  |  |  |  |  |
|--|--|--|--|--|--|
|  |  |  |  |  |  |
|--|--|--|--|--|--|

**MoCA Test:**

**Animal Recall:**

**Score:**

--

**COMMENTS:**

| COMMENTS            |                        |
|---------------------|------------------------|
| 1 Refused Test      | 4 Test Incomplete      |
| 2 Physically Unable | 5 Test Abandoned       |
| 3 Best Attempt      | 6 Other (please State) |

NICOLA ID:

|  |  |  |  |  |  |
|--|--|--|--|--|--|
|  |  |  |  |  |  |
|--|--|--|--|--|--|

|                                               |            |                  |
|-----------------------------------------------|------------|------------------|
| <b>MOCA and Animal Recall</b><br>Recorded By: | Signature: | Date: __/__/____ |
|-----------------------------------------------|------------|------------------|

**CES-D**

**Circle Answer Number**

**1) I was bothered by things that usually don't bother me**

**'WOULD YOU SAY THIS STATEMENT DESCRIBES THE WAY YOU FELT DURING THE PAST WEEK**

1. Rarely or none of the time (less than 1 day).
2. Some or little of the time (1-2 days).
3. Occasionally or a moderate amount of time (3-4 days).
4. All of the time (5-7 days).
5. Don't Know
6. Refused

**2) I did not feel like eating; my appetite was poor.**

**'WOULD YOU SAY THIS STATEMENT DESCRIBES THE WAY YOU FELT DURING THE PAST WEEK**

1. Rarely or none of the time (less than 1 day).
2. Some or little of the time (1-2 days).
3. Occasionally or a moderate amount of time (3-4 days).
4. All of the time (5-7 days).
5. Don't Know
6. Refused

**3) I felt that I could not shake off the blues even with help from my family or friends.**

**'WOULD YOU SAY THIS STATEMENT DESCRIBES THE WAY YOU FELT DURING THE PAST WEEK**

1. Rarely or none of the time (less than 1 day).
2. Some or little of the time (1-2 days).
3. Occasionally or a moderate amount of time (3-4 days).
4. All of the time (5-7 days).
5. Don't Know
6. Refused

**4) I felt that I was just as good as other people.**

**'WOULD YOU SAY THIS STATEMENT DESCRIBES THE WAY YOU FELT DURING THE PAST WEEK**

1. Rarely or none of the time (less than 1 day).
2. Some or little of the time (1-2 days).
3. Occasionally or a moderate amount of time (3-4 days).
4. All of the time (5-7 days).
5. Don't Know
6. Refused

**5) I had trouble keeping my mind on what I was doing.**

**'WOULD YOU SAY THIS STATEMENT DESCRIBES THE WAY YOU FELT DURING THE PAST WEEK**

1. Rarely or none of the time (less than 1 day).
2. Some or little of the time (1-2 days).
3. Occasionally or a moderate amount of time (3-4 days).
4. All of the time (5-7 days).
5. Don't Know
6. Refused

| COMMENTS |                      |
|----------|----------------------|
| 1        | Refused Test         |
| 2        | Physically Unable    |
| 3        | Best Attempt         |
| 4        | Test Incomplete      |
| 5        | Test Abandoned       |
| 6        | Other (please State) |

NICOLA ID:

|  |  |  |  |  |  |
|--|--|--|--|--|--|
|  |  |  |  |  |  |
|--|--|--|--|--|--|

|                     |                   |                              |
|---------------------|-------------------|------------------------------|
| <b>Comments:</b>    |                   |                              |
| <b>Recorded By:</b> | <b>Signature:</b> | <b>Date:</b> ___ / ___ / ___ |

**6) I felt depressed.**

**'WOULD YOU SAY THIS STATEMENT DESCRIBES THE WAY YOU FELT DURING THE PAST WEEK**

1. Rarely or none of the time (less than 1 day).
2. Some or little of the time (1-2 days).
3. Occasionally or a moderate amount of time (3-4 days).
4. All of the time (5-7 days).
5. Don't Know
6. Refused

**7) I felt that everything I did was an effort.**

**'WOULD YOU SAY THIS STATEMENT DESCRIBES THE WAY YOU FELT DURING THE PAST WEEK**

1. Rarely or none of the time (less than 1 day).
2. Some or little of the time (1-2 days).
3. Occasionally or a moderate amount of time (3-4 days).
4. All of the time (5-7 days).
5. Don't Know
6. Refused

**8) I felt hopeful about the future.**

**'WOULD YOU SAY THIS STATEMENT DESCRIBES THE WAY YOU FELT DURING THE PAST WEEK**

1. Rarely or none of the time (less than 1 day).
2. Some or little of the time (1-2 days).
3. Occasionally or a moderate amount of time (3-4 days).
4. All of the time (5-7 days).
5. Don't Know
6. Refused

**9) I thought my life had been a failure.**

**'WOULD YOU SAY THIS STATEMENT DESCRIBES THE WAY YOU FELT DURING THE PAST WEEK**

1. Rarely or none of the time (less than 1 day).
2. Some or little of the time (1-2 days).
3. Occasionally or a moderate amount of time (3-4 days).
4. All of the time (5-7 days).
5. Don't Know
6. Refused

**10) I felt fearful.**

**'WOULD YOU SAY THIS STATEMENT DESCRIBES THE WAY YOU FELT DURING THE PAST WEEK**

1. Rarely or none of the time (less than 1 day).
2. Some or little of the time (1-2 days).
3. Occasionally or a moderate amount of time (3-4 days).
4. All of the time (5-7 days).
5. Don't Know
6. Refused

|  |
|--|
|  |
|--|

| COMMENTS |                      |
|----------|----------------------|
| 1        | Refused Test         |
| 2        | Physically Unable    |
| 3        | Best Attempt         |
| 4        | Test Incomplete      |
| 5        | Test Abandoned       |
| 6        | Other (please State) |

NICOLA ID:

|  |  |  |  |  |  |
|--|--|--|--|--|--|
|  |  |  |  |  |  |
|--|--|--|--|--|--|

|                     |                   |                           |
|---------------------|-------------------|---------------------------|
| <b>Comments:</b>    |                   |                           |
| <b>Recorded By:</b> | <b>Signature:</b> | <b>Date:</b> __ / __ / __ |

**11) My sleep was restless.**

**'WOULD YOU SAY THIS STATEMENT DESCRIBES THE WAY YOU FELT DURING THE PAST WEEK**

1. Rarely or none of the time (less than 1 day).
2. Some or little of the time (1-2 days).
3. Occasionally or a moderate amount of time (3-4 days).
4. All of the time (5-7 days).
5. Don't Know
6. Refused

**12) I was happy.**

**'WOULD YOU SAY THIS STATEMENT DESCRIBES THE WAY YOU FELT DURING THE PAST WEEK**

1. Rarely or none of the time (less than 1 day).
2. Some or little of the time (1-2 days).
3. Occasionally or a moderate amount of time (3-4 days).
4. All of the time (5-7 days).
5. Don't Know
6. Refused

**13) I talked less than usual.**

**'WOULD YOU SAY THIS STATEMENT DESCRIBES THE WAY YOU FELT DURING THE PAST WEEK**

1. Rarely or none of the time (less than 1 day).
2. Some or little of the time (1-2 days).
3. Occasionally or a moderate amount of time (3-4 days).
4. All of the time (5-7 days).
5. Don't Know
6. Refused

**14) I felt lonely.**

**'WOULD YOU SAY THIS STATEMENT DESCRIBES THE WAY YOU FELT DURING THE PAST WEEK**

1. Rarely or none of the time (less than 1 day).
2. Some or little of the time (1-2 days).
3. Occasionally or a moderate amount of time (3-4 days).
4. All of the time (5-7 days).
5. Don't Know
6. Refused

**15) People were unfriendly.**

**'WOULD YOU SAY THIS STATEMENT DESCRIBES THE WAY YOU FELT DURING THE PAST WEEK**

1. Rarely or none of the time (less than 1 day).
2. Some or little of the time (1-2 days).
3. Occasionally or a moderate amount of time (3-4 days).
4. All of the time (5-7 days).
5. Don't Know
6. Refused

|  |
|--|
|  |
|--|

| COMMENTS            |                        |
|---------------------|------------------------|
| 1 Refused Test      | 4 Test Incomplete      |
| 2 Physically Unable | 5 Test Abandoned       |
| 3 Best Attempt      | 6 Other (please State) |



NICOLA ID:

|  |  |  |  |  |  |
|--|--|--|--|--|--|
|  |  |  |  |  |  |
|--|--|--|--|--|--|

|                     |                   |                           |
|---------------------|-------------------|---------------------------|
| <b>Comments:</b>    |                   |                           |
| <b>Recorded By:</b> | <b>Signature:</b> | <b>Date:</b> __ / __ / __ |

**16) I enjoyed life.**

**'WOULD YOU SAY THIS STATEMENT DESCRIBES THE WAY YOU FELT DURING THE PAST WEEK**

1. Rarely or none of the time (less than 1 day).
2. Some or little of the time (1-2 days).
3. Occasionally or a moderate amount of time (3-4 days).
4. All of the time (5-7 days).
5. Don't Know
6. Refused

**17) I had crying spells.**

**'WOULD YOU SAY THIS STATEMENT DESCRIBES THE WAY YOU FELT DURING THE PAST WEEK**

1. Rarely or none of the time (less than 1 day).
2. Some or little of the time (1-2 days).
3. Occasionally or a moderate amount of time (3-4 days).
4. All of the time (5-7 days).
5. Don't Know
6. Refused

**18) I felt sad.**

**'WOULD YOU SAY THIS STATEMENT DESCRIBES THE WAY YOU FELT DURING THE PAST WEEK**

1. Rarely or none of the time (less than 1 day).
2. Some or little of the time (1-2 days).
3. Occasionally or a moderate amount of time (3-4 days).
4. All of the time (5-7 days).
5. Don't Know
6. Refused

**19) I felt that people disliked me.**

**'WOULD YOU SAY THIS STATEMENT DESCRIBES THE WAY YOU FELT DURING THE PAST WEEK**

1. Rarely or none of the time (less than 1 day).
2. Some or little of the time (1-2 days).
3. Occasionally or a moderate amount of time (3-4 days).
4. All of the time (5-7 days).
5. Don't Know
6. Refused

**20) I could not get "going."**

**'WOULD YOU SAY THIS STATEMENT DESCRIBES THE WAY YOU FELT DURING THE PAST WEEK**

1. Rarely or none of the time (less than 1 day).
2. Some or little of the time (1-2 days).
3. Occasionally or a moderate amount of time (3-4 days).
4. All of the time (5-7 days).
5. Don't Know
6. Refused

|  |
|--|
|  |
|--|

| COMMENTS |                      |
|----------|----------------------|
| 1        | Refused Test         |
| 2        | Physically Unable    |
| 3        | Best Attempt         |
| 4        | Test Incomplete      |
| 5        | Test Abandoned       |
| 6        | Other (please State) |

NICOLA ID:

|  |  |  |  |  |  |
|--|--|--|--|--|--|
|  |  |  |  |  |  |
|--|--|--|--|--|--|

|                     |                   |                           |
|---------------------|-------------------|---------------------------|
| <b>Comments:</b>    |                   |                           |
| <b>Recorded By:</b> | <b>Signature:</b> | <b>Date:</b> __ / __ / __ |

| COMMENTS |                      |
|----------|----------------------|
| 1        | Refused Test         |
| 2        | Physically Unable    |
| 3        | Best Attempt         |
| 4        | Test Incomplete      |
| 5        | Test Abandoned       |
| 6        | Other (please State) |
